# Supplementary material for: Palaeoseismic crisis in the Galera Fault (S Spain). Consequences in Bronze Age settlements?
Source: Copernicus journal article supplement (doi:10.5194/egusphere-2023-2401), 2023-11-28
Supplement: Supplementary file 1 [file egusphere-2023-2401-supplement.pdf]

| Sample       | Trench | Type             | Radiocarbon age |          | Calibrated age |         | Percent of modern Carbon |          |         | D14C     |         | Δ14C     |  |
|--------------|--------|------------------|-----------------|----------|----------------|---------|--------------------------|----------|---------|----------|---------|----------|--|
|              |        |                  | BP              | 1σ error | from_95.4      | to_95.4 | pMC                      | 1σ error | ‰       | 1σ error | ‰       | 1σ error |  |
| R_Date A-17W | PIL    | Organic Sediment | 21560           | 70       | -24031         | -23806  | 6.83                     | 0.06     | -931.71 | 0.6      | -932.28 | 0.6      |  |
| R_Date A-6W  | PIL    | Charcoal         | 5600            | 30       | -4494          | -4355   | 49.8                     | 0.19     | -501.99 | 1.86     | -506.19 | 1.86     |  |
| R_Date A-7W  | PIL    | Organic Sediment | 3800            | 30       | -2343          | -2138   | 62.31                    | 0.23     | -376.9  | 2.33     | -382.16 | 2.33     |  |
| R_Date C-12W | PIL    | Organic Sediment | 12750           | 40       | -13396         | -13111  | 20.45                    | 0.1      | -795.51 | 1.02     | -797.23 | 1.02     |  |
| R_Date C-8W  | PIL    | Organic Sediment | 4900            | 30       | -3765          | -3636   | 54.34                    | 0.2      | -456.64 | 2.03     | -461.22 | 2.03     |  |
| R_Date C-7E  | PIL    | Charcoal         | 970             | 30       | 1022           | 1159    | 88.63                    | 0.33     | -113.75 | 3.31     | -121.33 | 3.31     |  |
| R_Date A3    | RUB    | Charcoal         | 3300            | 30       | -1629          | -1502   | 66.31                    | 0.25     | -336.89 | 2.48     | -342.56 | 2.48     |  |
| R_Date B2    | RUB    | Charcoal         | 3040            | 30       | -1401          | -1216   | 68.49                    | 0.26     | -315.07 | 2.56     | -320.93 | 2.56     |  |
| R_Date C3    | RUB    | Charcoal         | 3100            | 30       | -1434          | -1278   | 67.98                    | 0.25     | -320.17 | 2.54     | -325.98 | 2.54     |  |
| R_Date C4    | RUB    | Charcoal         | 3210            | 30       | -1519          | -1422   | 67.06                    | 0.25     | -329.42 | 2.5      | -335.15 | 2.5      |  |
| R_Date D1    | RUB    | Charcoal         | 3130            | 30       | -1496          | -1298   | 67.73                    | 0.25     | -322.7  | 2.53     | -328.58 | 2.53     |  |
| R_Date E1    | RUB    | Charcoal         | 3020            | 30       | -1391          | -1130   | 68.66                    | 0.26     | -313.37 | 2.56     | -319.24 | 2.56     |  |
| R_Date F2    | RUB    | Charcoal         | 3060            | 30       | -1412          | -1227   | 68.32                    | 0.26     | -316.78 | 2.55     | -322.62 | 2.55     |  |

## PIL site, trench A

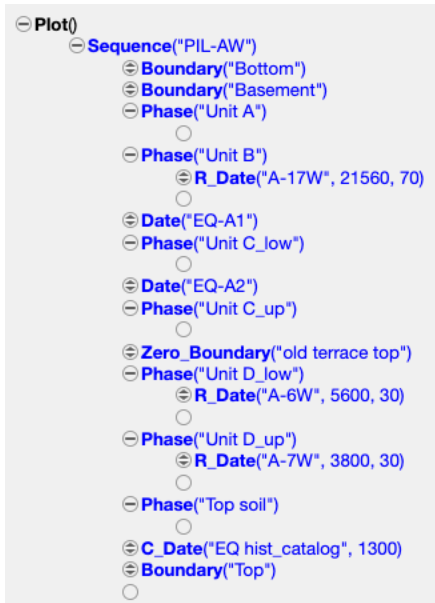

Plot()

```
{
  Sequence("PIL-AW")
  {
    Boundary("Bottom");
    Boundary("Basement");
    Phase("Unit A")
    {
    };
    Phase("Unit B")
    {
      R_Date("A-17W", 21560, 70);
    };
    Date("EQ-A1");
    Phase("Unit C_low")
    {
    };
    Date("EQ-A2");
    Phase("Unit C_up")
```

```
{  
};  
Zero_Boundary("old terrace top");  
Phase("Unit D_low")  
{  
  R_Date("A-6W", 5600, 30);  
};  
Phase("Unit D_up")  
{  
  R_Date("A-7W", 3800, 30);  
};  
Phase("Top soil")  
{  
};  
C_Date("EQ hist_catalog", 1300);  
Boundary("Top");  
};  
};
```

## PIL site, trench C

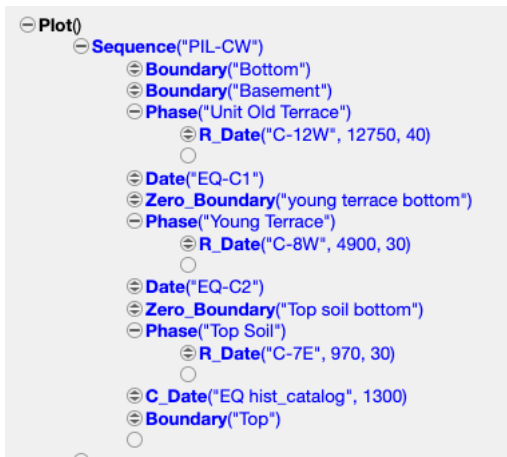

Plot()

```
{
Sequence("PIL-CW")
{
Boundary("Bottom");
Boundary("Basement");
Phase("Unit Old Terrace")
{
R_Date("C-12W", 12750, 40);
};
Date("EQ-C1");
Zero_Boundary("young terrace bottom");
Phase("Young Terrace")
{
R_Date("C-8W", 4900, 30);
};
Date("EQ-C2");
Zero_Boundary("Top soil bottom");
Phase("Top Soil")
{
R_Date("C-7E", 970, 30);
};
};
C_Date("EQ hist_catalog", 1300);
Boundary("Top");
};
};
```

## RUB trench ALL earthquakes

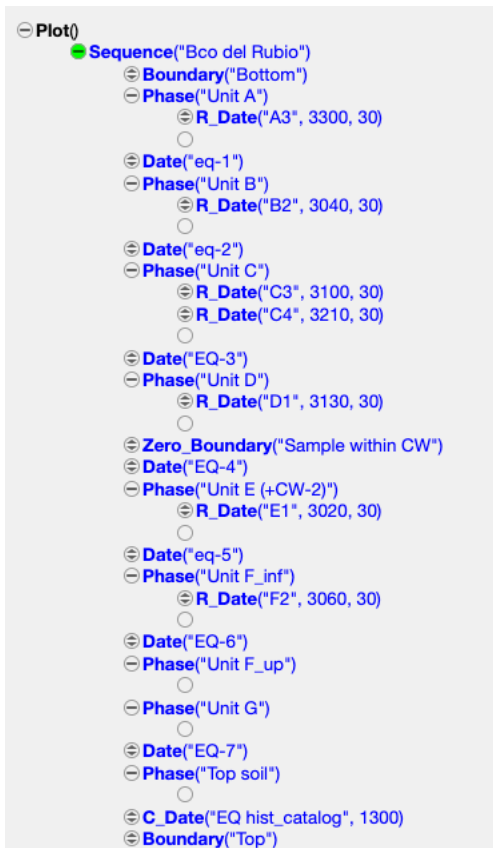

Plot()

```
{
Sequence("Bco del Rubio")
{
Boundary("Bottom");
Phase("Unit A")
{
R_Date("A3", 3300, 30);
};
Date("eq-1");
Phase("Unit B")
{
```

```
R_Date("B2", 3040, 30);
};
Date("eq-2");
Phase("Unit C")
{
  R_Date("C3", 3100, 30);
  R_Date("C4", 3210, 30);
};
Date("EQ-3");
Phase("Unit D")
{
  R_Date("D1", 3130, 30);
};
Zero_Boundary("Sample within CW");
Date("EQ-4");
Phase("Unit E (+CW-2)")
{
  R_Date("E1", 3020, 30);
};
Date("eq-5");
Phase("Unit F_inf")
{
  R_Date("F2", 3060, 30);
};
Date("EQ-6");
Phase("Unit F_up")
{
};
Phase("Unit G")
{
};
Date("EQ-7");
```

```
Phase("Top soil")
{
};
C_Date("EQ hist_catalog", 1300);
Boundary("Top");
};
};
```

## RUB trench MAJOR earthquakes

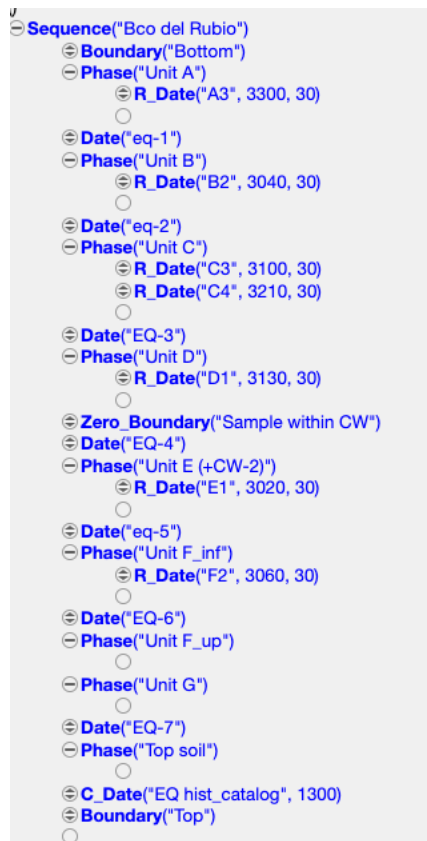

Plot()

```
{
Sequence("Bco del Rubio")
{
Boundary("Bottom");
Phase("Unit A")
{
R_Date("A3", 3300, 30);
};
Date("eq-1");
Phase("Unit B")
{
R_Date("B2", 3040, 30);
};
Date("eq-2");
```



```
Phase("Unit C")
{
  R_Date("C3", 3100, 30);
  R_Date("C4", 3210, 30);
};
Date("EQ-3");
Phase("Unit D")
{
  R_Date("D1", 3130, 30);
};
Zero_Boundary("Sample within CW");
Date("EQ-4");
Phase("Unit E (+CW-2)")
{
  R_Date("E1", 3020, 30);
};
Date("eq-5");
Phase("Unit F_inf")
{
  R_Date("F2", 3060, 30);
};
Date("EQ-6");
Phase("Unit F_up")
{
};
Phase("Unit G")
{
};
Date("EQ-7");
Phase("Top soil")
{
};
```

```
C_Date("EQ hist_catalog", 1300);
```

```
Boundary("Top");
```

```
};
```

```
};
```
